# Supplementary material for: A theoretical study on the strain energy of helicene-containing carbon nanobelts
Source: Royal Society of Chemistry journal article supplement (doi:10.1039/d0cc06373h), 2020-01-01
Supplement: d0cc06373h2.pdf [file d0cc06373h2.pdf]

## Supporting Information

---

### **A theoretical study on the strain energy of helicene-containing carbon nanobelts**

Kosuke Watanabe,<sup>a,b</sup> Yasutomo Segawa,<sup>a,b,c,d,\*</sup> Kenichiro Itami<sup>a,c,e,\*</sup>

<sup>a</sup>*Graduate School of Science, Nagoya University, Chikusa, Nagoya 464-8602, Japan.*

<sup>b</sup>*Institute for Molecular Science, Myodaiji, Okazaki, 444-8787, Japan.*

<sup>c</sup>*JST, ERATO, Itami Molecular Nanocarbon Project, Chikusa, Nagoya 464-8602, Japan.*

<sup>d</sup>*Department of Structural Molecular Science, SOKENDAI  
(The Graduate University for Advanced Studies), Myodaiji, Okazaki, 444-8787, Japan.*

<sup>e</sup>*Institute of Transformative Bio-molecules (WPI-ITbM), Nagoya University,  
Chikusa, Nagoya 464-8602, Japan.*

E-mail: ysegawa@nagoya-u.jp (YS), itami@chem.nagoya-u.ac.jp (KI)

---

#### **Table of Contents**

|                                          |         |
|------------------------------------------|---------|
| 1. Methods of DFT study                  | S2      |
| 2. Hypothetical reactions                | S2–S3   |
| 3. Strain energy of CNBs                 | S4–S9   |
| 4. Energy values of optimized structures | S10–S12 |
| 5. References                            | S13     |

## 1. Methods of DFT study

The Gaussian 16 program<sup>S1</sup> running on a NEC LX 110Rh system was used for optimization. B3LYP/6-31G(d)<sup>S2,S3</sup> level of theory was used unless otherwise noted. Structures were optimized without any symmetry assumptions. Plots and regression lines were drawn by Microsoft® Excel for Mac version 16.16.27. SEs per carbon atom were SE values divided by total number of carbon atoms.

## 2. Hypothetical reactions

**Scheme S1.** A hypothetical homodesmotic reaction for **B<sub>6</sub>**.

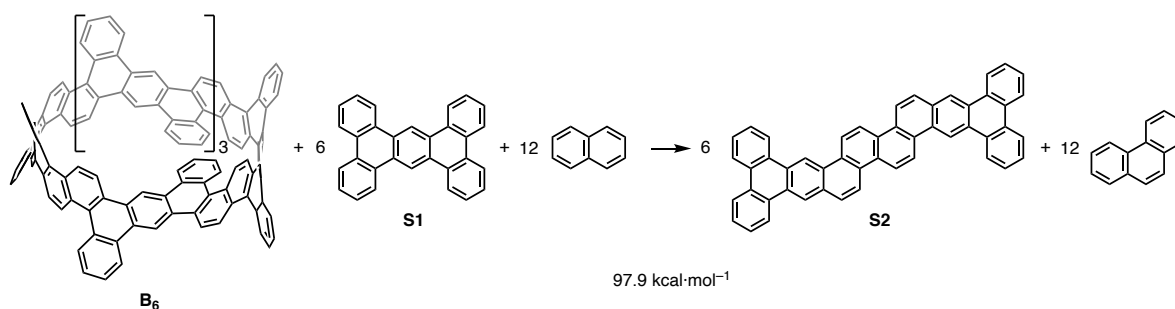

**Scheme S2.** Hypothetical homodesmotic reactions for [4]- and [5]helicenes.<sup>a</sup>

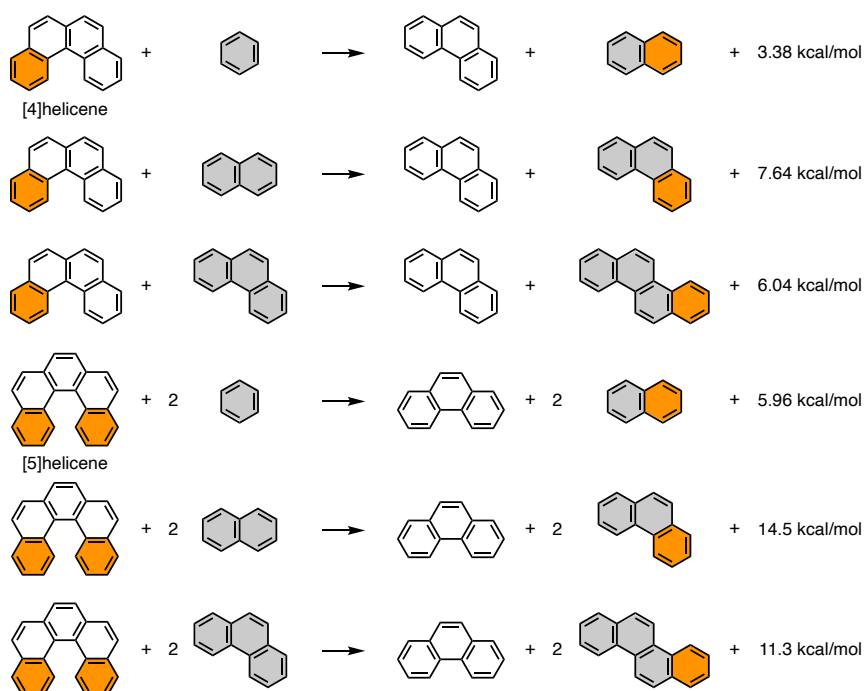

<sup>a</sup> According to these results and previous works,<sup>24,25</sup> SEs are dependent on the choice of reference molecules, and are underestimated when benzene/naphthalene is used. Also, using large  $\pi$ -conjugated molecules such as chrysene may cause underestimation. To avoid such problem, we chose phenanthrene and naphthalene as reference molecules in this work.

**Scheme S3.** Hypothetical homodesmotic reactions for  $J_6$  and  $K_6$ .

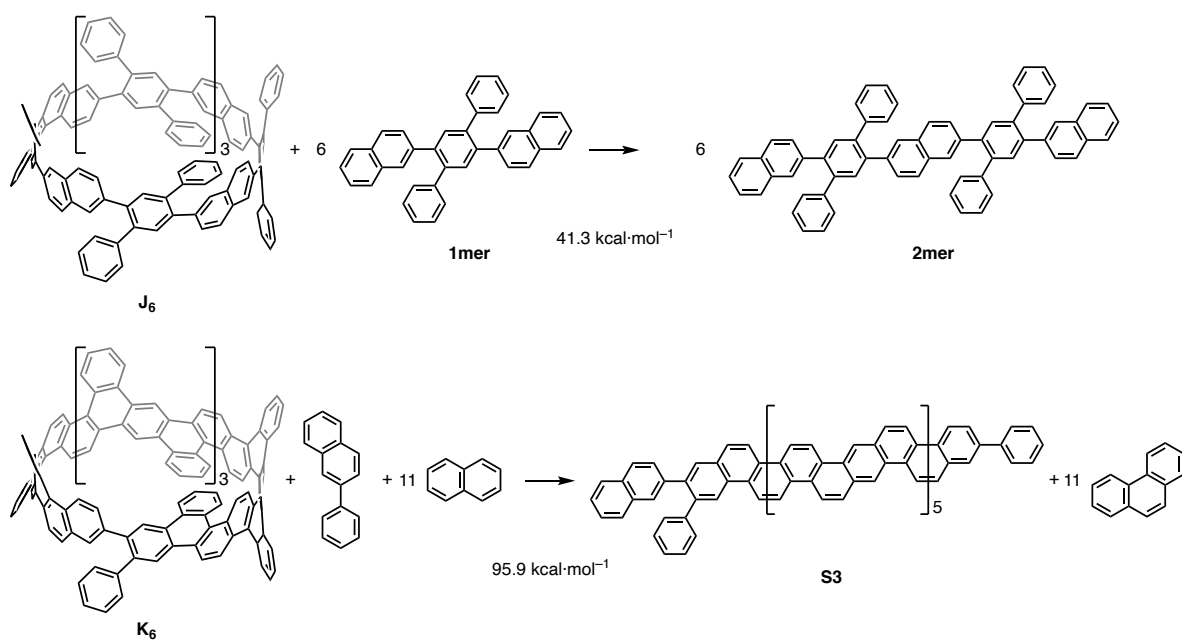

**Scheme S4.** SEs of [4]- and [5]helicenes calculated by B3LYP/6-31G(d), B3LYP-D3/6-31G(d),<sup>S4</sup> and M06-2X/6-31G(d)<sup>S5</sup> level of theory.<sup>a</sup>

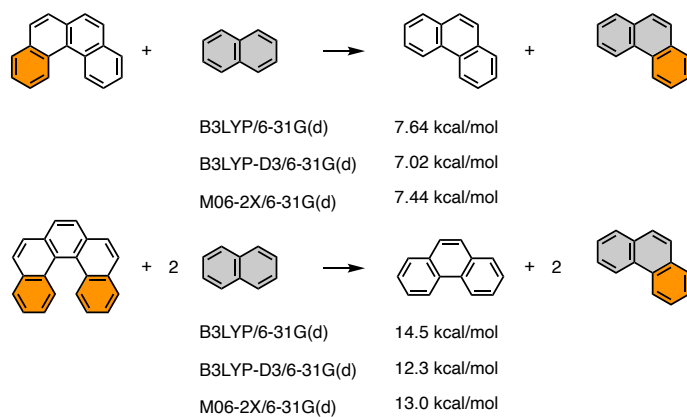

<sup>a</sup> According to these results and previous works,<sup>25</sup> SEs of [4]- and [5]helicenes are slightly underestimated when B3LYP-D3 or M06-2X level of theory is used.

### 3. Strain energies of CNBs

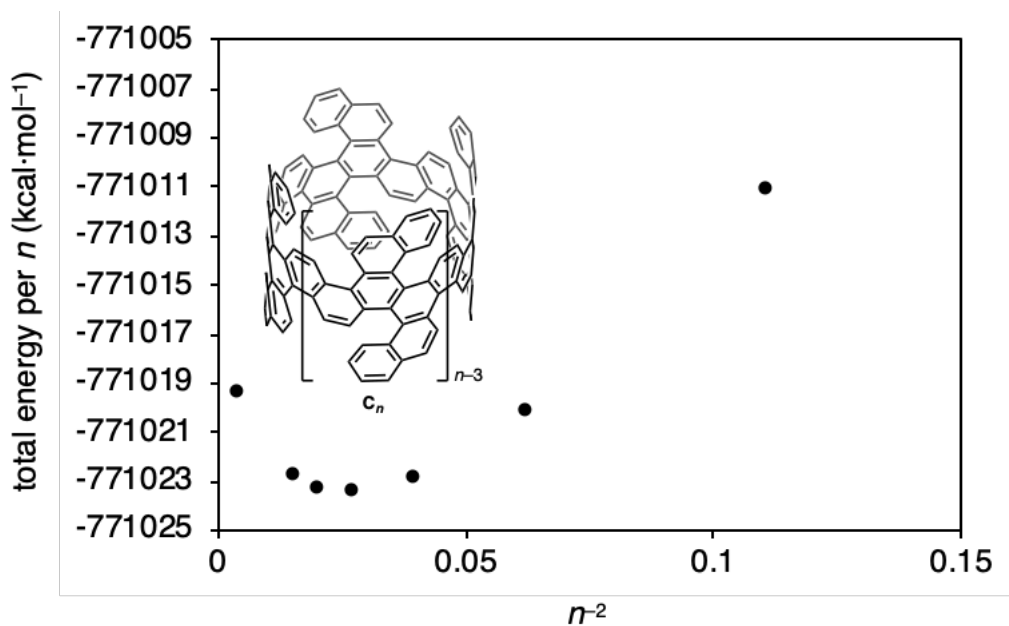

Fig. S1 Plot of the total energy per  $n$  of  $\text{C}_n$  versus  $n^{-2}$ .

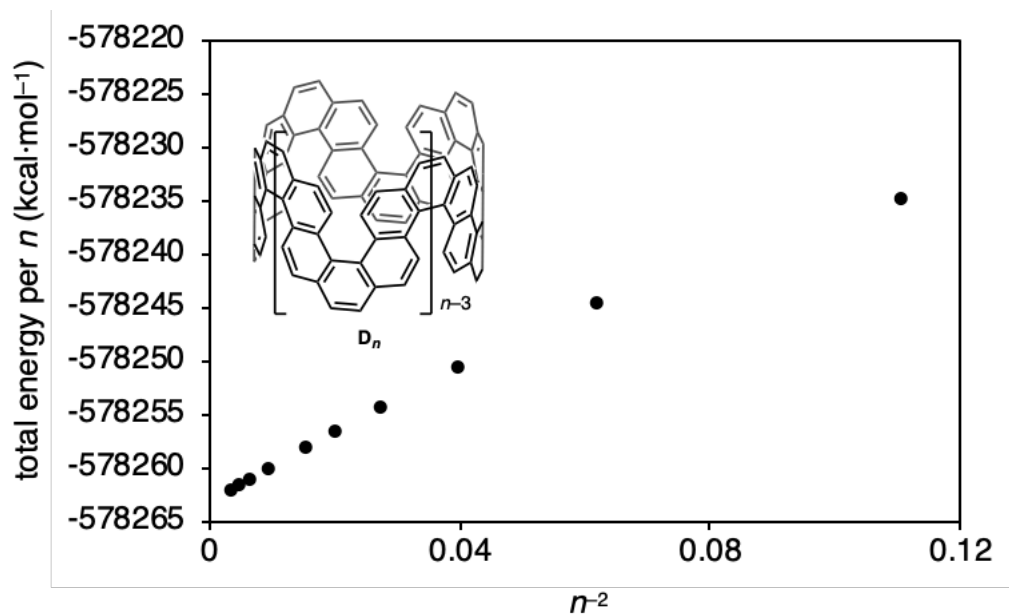

Fig. S2 Plot of the total energy per  $n$  of  $\text{D}_n$  versus  $n^{-2}$ .

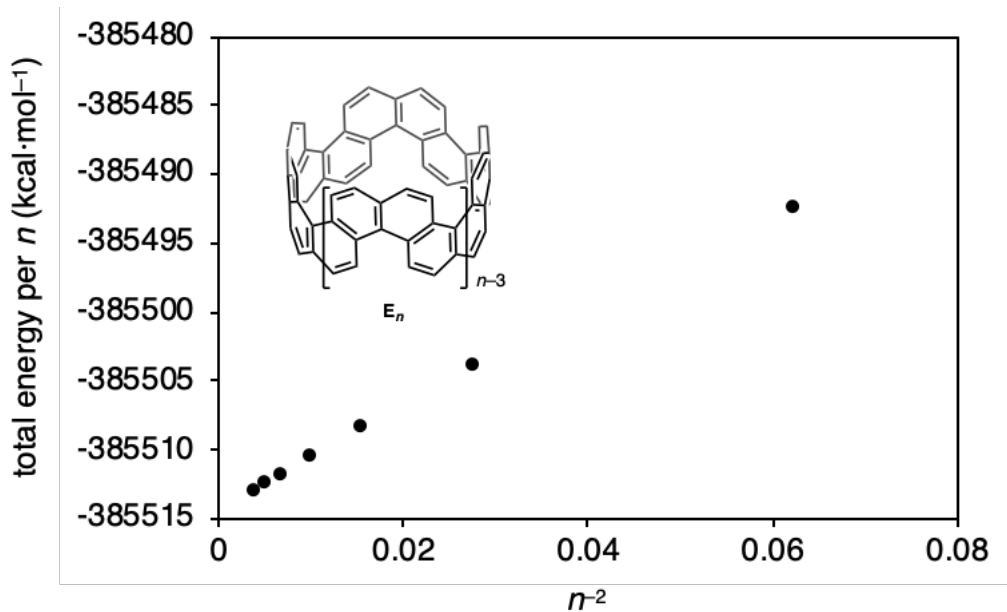

Fig. S3 Plot of the total energy per  $n$  of  $E_n$  versus  $n^{-2}$ .

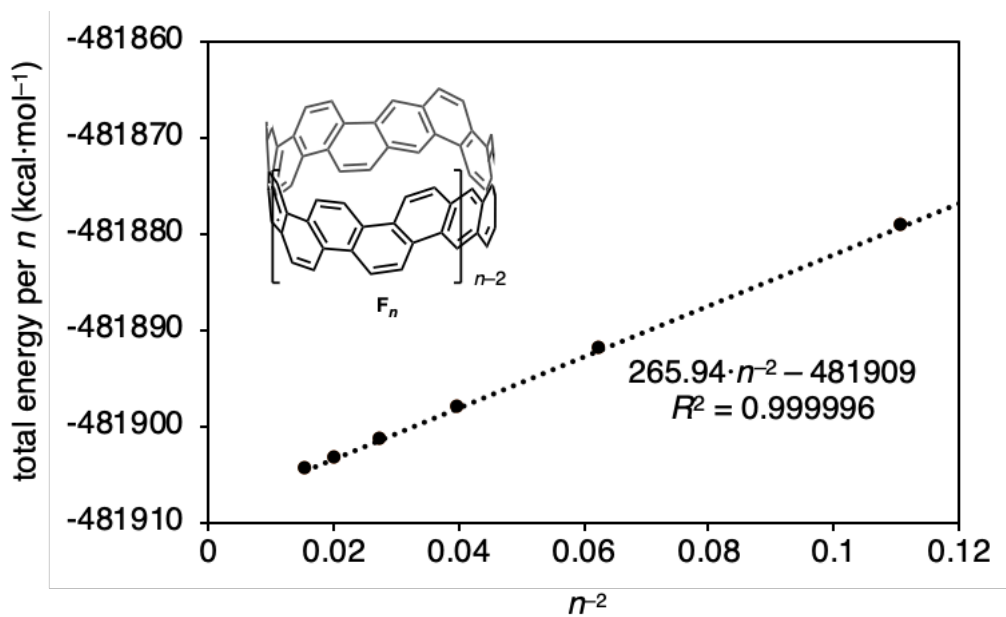

Fig. S4 Plot of the total energy per  $n$  of  $F_n$  versus  $n^{-2}$  with the linear regression line.

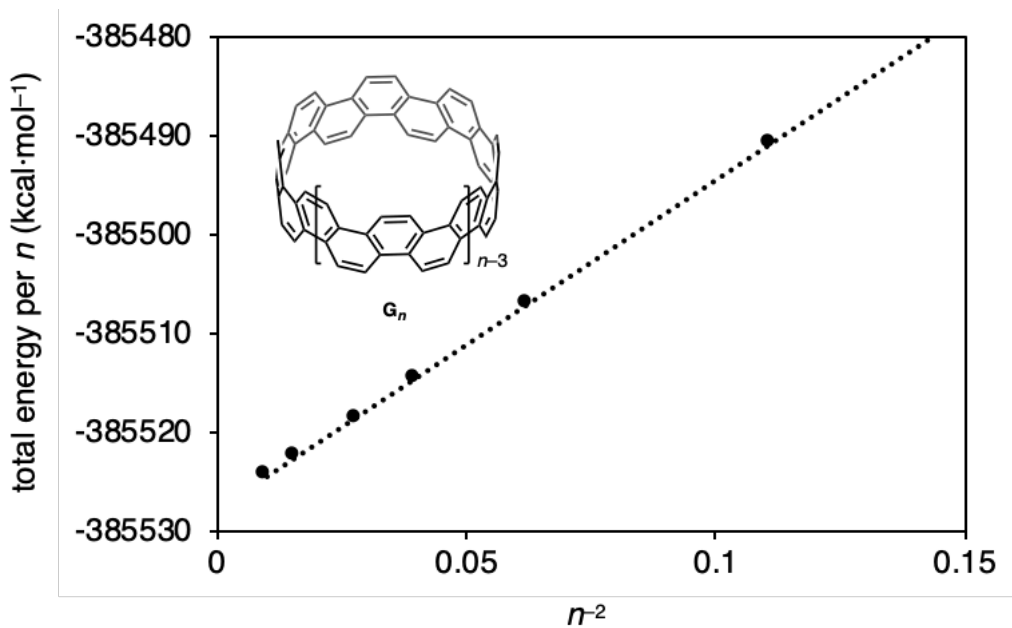

Fig. S5 Plot of the total energy per  $n$  of  $G_n$  versus  $n^{-2}$  with the linear regression line.

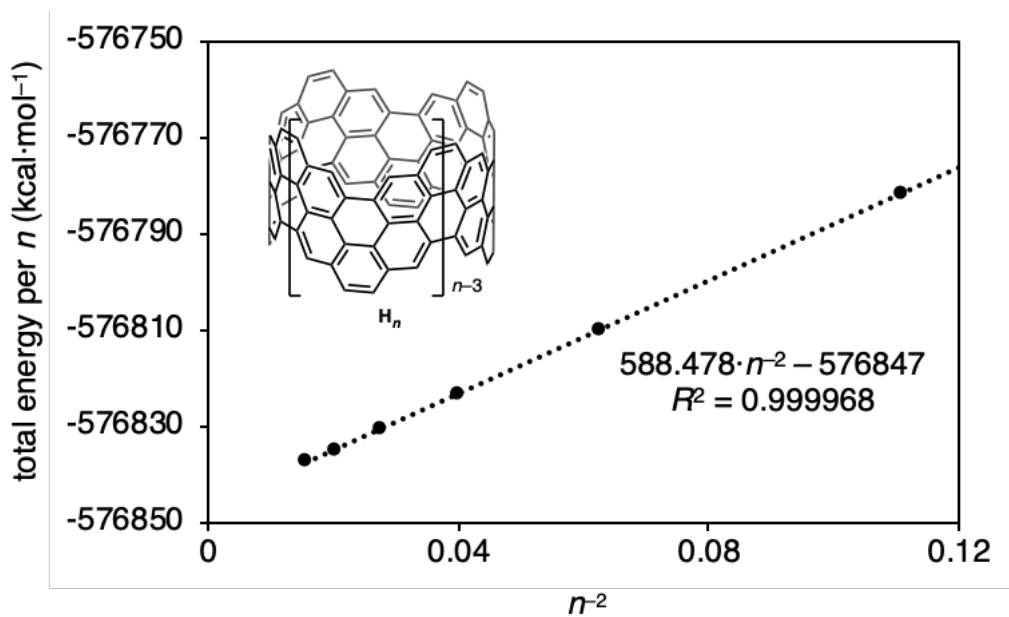

Fig. S6 Plot of the total energy per  $n$  of  $H_n$  versus  $n^{-2}$  with the linear regression line.

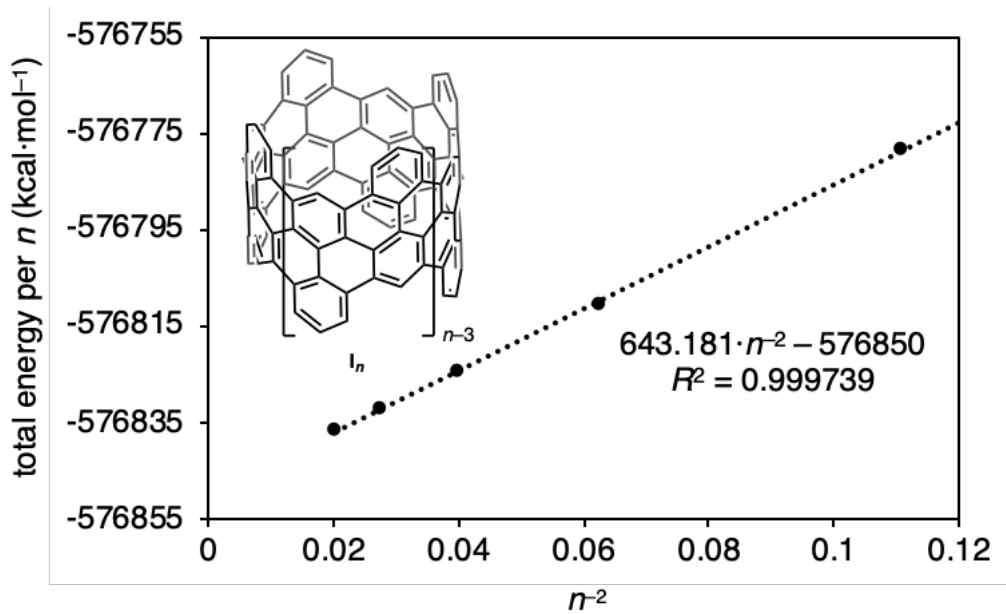

**Fig. S7** Plot of the total energy per  $n$  of  $I_n$  versus  $n^{-2}$  with the linear regression line.

**Table S1** SE and diameter of **A<sub>n</sub>**.

| <i>n</i> | SE (kcal·mol <sup>-1</sup> ) | diameter (Å) | SE per carbon atom<br>(kcal·mol <sup>-1</sup> ) |
|----------|------------------------------|--------------|-------------------------------------------------|
| 4        | 86.93                        | 11.07        | 1.358                                           |
| 5        | 69.54                        | 13.82        | 0.869                                           |
| 6        | 57.95                        | 16.57        | 0.604                                           |
| 8        | 43.46                        | 22.07        | 0.340                                           |
| 10       | 34.77                        | 27.58        | 0.217                                           |
| 12       | 28.98                        | 33.09        | 0.151                                           |
| 16       | 21.73                        | 44.12        | 0.085                                           |

**Table S2** SE and diameter of **B<sub>n</sub>**.

| <i>n</i> | SE (kcal·mol <sup>-1</sup> ) | diameter (Å) | SE per carbon atom<br>(kcal·mol <sup>-1</sup> ) |
|----------|------------------------------|--------------|-------------------------------------------------|
| 4        | 85.91                        | 13.87        | 0.767                                           |
| 5        | 90.15                        | 17.32        | 0.644                                           |
| 6        | 99.10                        | 20.77        | 0.590                                           |
| 7        | 110.73                       | 24.22        | 0.565                                           |
| 8        | 123.98                       | 27.67        | 0.553                                           |
| 9        | 138.30                       | 31.12        | 0.549                                           |
| 10       | 153.31                       | 34.58        | 0.548                                           |
| 12       | 184.89                       | 41.48        | 0.550                                           |
| 14       | 217.55                       | 48.38        | 0.555                                           |

**Table S3** SE and diameter of **C<sub>n</sub>**.

| <i>n</i> | SE (kcal·mol <sup>-1</sup> ) | diameter (Å) | SE per carbon atom<br>(kcal·mol <sup>-1</sup> ) |
|----------|------------------------------|--------------|-------------------------------------------------|
| 3        | 146.24                       | 8.35         | 1.523                                           |
| 4        | 158.84                       | 11.04        | 1.241                                           |
| 5        | 185.14                       | 13.73        | 1.157                                           |
| 6        | 218.60                       | 16.44        | 1.139                                           |
| 7        | 256.22                       | 19.15        | 1.144                                           |
| 8        | 296.53                       | 21.86        | 1.158                                           |
| 15       | 607.49                       | 40.87        | 1.266                                           |



**Table S4** SE and diameter of  $D_n$ .

| $n$ | SE (kcal·mol <sup>-1</sup> ) | diameter (Å) | SE per carbon atom (kcal·mol <sup>-1</sup> ) |
|-----|------------------------------|--------------|----------------------------------------------|
| 3   | 178.23                       | 9.11         | 2.475                                        |
| 4   | 198.11                       | 12.00        | 2.064                                        |
| 5   | 218.05                       | 14.88        | 1.817                                        |
| 6   | 239.90                       | 17.77        | 1.666                                        |
| 7   | 263.71                       | 20.68        | 1.570                                        |
| 8   | 288.95                       | 23.59        | 1.505                                        |
| 10  | 342.58                       | 29.37        | 1.427                                        |
| 12  | 398.78                       | 35.22        | 1.385                                        |
| 14  | 456.48                       | 41.08        | 1.359                                        |
| 16  | 515.28                       | 46.93        | 1.342                                        |

**Table S5** SE and diameter of  $E_n$ .

| $n$ | SE (kcal·mol <sup>-1</sup> ) | diameter (Å) | SE per carbon atom (kcal·mol <sup>-1</sup> ) |
|-----|------------------------------|--------------|----------------------------------------------|
| 4   | 156.03                       | 9.70         | 2.438                                        |
| 6   | 165.05                       | 14.36        | 1.719                                        |
| 8   | 183.80                       | 19.10        | 1.436                                        |
| 10  | 208.03                       | 23.86        | 1.300                                        |
| 12  | 235.31                       | 28.63        | 1.226                                        |
| 14  | 264.39                       | 33.39        | 1.180                                        |
| 16  | 294.65                       | 38.16        | 1.151                                        |

#### 4. Energy values of optimized structures

**Table S6** Uncorrected and thermal-corrected (298 K) energies of stationary points (Hartree).<sup>a</sup>

|                       | <i>E</i>       | <i>E</i> + <i>ZPE</i> | <i>H</i>     | <i>G</i>     |
|-----------------------|----------------|-----------------------|--------------|--------------|
| <b>A<sub>4</sub></b>  | 2458.16344407  | -2457.41707           | -2457.37559  | -2457.48243  |
| <b>A<sub>5</sub></b>  | -3072.76872158 | -3071.83458           | -3071.78218  | -3071.91234  |
| <b>A<sub>6</sub></b>  | -3687.36459936 | -3686.24284           | -3686.17949  | -3686.33321  |
| <b>A<sub>8</sub></b>  | -4916.54208781 | -4915.04546           | -4914.96015  | -4915.16193  |
| <b>A<sub>10</sub></b> | -6145.71018037 | -6143.83872           | -6143.73151  | -6143.98126  |
| <b>A<sub>12</sub></b> | -7374.87336311 | -7372.62735           | -7372.49816  | -7372.79782  |
| <b>A<sub>16</sub></b> | -9833.19263837 | -9830.19755           | -9830.02447  | -9830.42133  |
| <b>B<sub>4</sub></b>  | -4301.90284889 | -4300.59021           | -4300.51607  | -4300.69328  |
| <b>B<sub>5</sub></b>  | -5377.40768833 | -5375.76600           | -5375.67280  | -5375.89104  |
| <b>B<sub>6</sub></b>  | -6452.90479112 | -6450.93432           | -6450.82202  | -6451.08185  |
| <b>B<sub>7</sub></b>  | -7528.39759911 | -7526.09836           | -7525.96698  | -7526.26853  |
| <b>B<sub>8</sub></b>  | -8603.88773146 | -8601.25982           | -8601.10934  | -8601.45283  |
| <b>B<sub>9</sub></b>  | -9679.37614114 | -9676.41958           | -9676.25000  | -9676.63565  |
| <b>B<sub>10</sub></b> | -10754.8633519 | -10751.57825          | -10751.38956 | -10751.81460 |
| <b>B<sub>12</sub></b> | -12905.8354408 | -12901.89309          | -12901.66620 | -12902.17643 |
| <b>B<sub>14</sub></b> | -15056.8055839 | -15052.20627          | -15051.94112 | -15052.53656 |
| <b>C<sub>3</sub></b>  | -3687.24115994 | -3686.11878           | -3686.05541  | -3686.20892  |
| <b>C<sub>4</sub></b>  | -4916.38170334 | -4914.88330           | -4914.79847  | -4914.99661  |
| <b>C<sub>5</sub></b>  | -6145.49983807 | -6143.62601           | -6143.51968  | -6143.76299  |
| <b>C<sub>6</sub></b>  | -7374.60637126 | -7372.35730           | -7372.22950  | -7372.51576  |
| <b>C<sub>7</sub></b>  | -8603.70605681 | -8601.08200           | -8600.93268  | -8601.26454  |
| <b>C<sub>8</sub></b>  | -9832.80154418 | -9829.80240           | -9829.63159  | -9830.00908  |
| <b>C<sub>15</sub></b> | -18436.4220478 | -18430.79945          | -18430.47798 | -18431.17933 |
| <b>D<sub>3</sub></b>  | -2765.31562521 | -2764.47695           | -2764.42991  | -2764.55049  |
| <b>D<sub>4</sub></b>  | -3687.15261318 | -3686.03306           | -3685.96986  | -3686.12538  |
| <b>D<sub>5</sub></b>  | -4608.98963340 | -4607.58878           | -4607.50971  | -4607.69680  |
| <b>D<sub>6</sub></b>  | -5530.82347353 | -5529.14145           | -5529.04650  | -5529.26854  |
| <b>D<sub>7</sub></b>  | -6452.65414403 | -6450.69105           | -6450.58019  | -6450.83421  |
| <b>D<sub>8</sub></b>  | -7374.48240468 | -7372.23843           | -7372.11159  | -7372.40161  |
| <b>D<sub>10</sub></b> | -9218.13394438 | -9215.32818           | -9215.16939  | -9215.52747  |
| <b>D<sub>12</sub></b> | -11061.7813084 | -11058.41387          | -11058.22308 | -11058.64845 |

|                       |                |              |              |              |
|-----------------------|----------------|--------------|--------------|--------------|
| <b>D<sub>14</sub></b> | -12905.4261809 | -12901.49720 | -12901.27439 | -12901.77080 |
| <b>D<sub>16</sub></b> | -14749.0694553 | -14744.57877 | -14744.32393 | -14744.88778 |
| <b>E<sub>4</sub></b>  | -2458.07505018 | -2457.32758  | -2457.28600  | -2457.39560  |
| <b>E<sub>6</sub></b>  | -3687.22671318 | -3686.10189  | -3686.03943  | -3686.19259  |
| <b>E<sub>8</sub></b>  | -4916.36229160 | -4914.86098  | -4914.77736  | -4914.97571  |
| <b>E<sub>10</sub></b> | -6145.48895017 | -6143.61139  | -6143.50655  | -6143.75054  |
| <b>E<sub>12</sub></b> | -7374.61062988 | -7372.35699  | -7372.23088  | -7372.52106  |
| <b>E<sub>14</sub></b> | -8603.72938382 | -8601.09972  | -8600.95233  | -8601.28883  |
| <b>E<sub>16</sub></b> | -9832.84622777 | -9829.84061  | -9829.67192  | -9830.05505  |
| <b>F<sub>3</sub></b>  | -2304.50939012 | -2303.80942  | -2303.77062  | -2303.87261  |
| <b>F<sub>4</sub></b>  | -3072.76452803 | -3071.82966  | -3071.77709  | -3071.90852  |
| <b>F<sub>5</sub></b>  | -3841.00518688 | -3839.83579  | -3839.76936  | -3839.93101  |
| <b>F<sub>6</sub></b>  | -4609.23849230 | -4607.83464  | -4607.75434  | -4607.94638  |
| <b>F<sub>7</sub></b>  | -5377.46754074 | -5375.82941  | -5375.73522  | -5375.95805  |
| <b>F<sub>8</sub></b>  | -6145.69397097 | -6143.82155  | -6143.71346  | -6143.96728  |
| <b>G<sub>3</sub></b>  | -1843.54505190 | -1842.98644  | -1842.95571  | -1843.04168  |
| <b>G<sub>4</sub></b>  | -2458.16723784 | -2457.42024  | -2457.37852  | -2457.48799  |
| <b>G<sub>5</sub></b>  | -3072.77082219 | -3071.83587  | -3071.78303  | -3071.91389  |
| <b>G<sub>6</sub></b>  | -3687.36516815 | -3686.24239  | -3686.17841  | -3686.33658  |
| <b>G<sub>8</sub></b>  | -4916.53999678 | -4915.04197  | -4914.95561  | -4915.16160  |
| <b>G<sub>10</sub></b> | -6145.70561216 | -6143.83260  | -6143.72382  | -6143.97881  |
| <b>H<sub>3</sub></b>  | -2758.23020855 | -2757.52056  | -2757.48079  | -2757.58157  |
| <b>H<sub>4</sub></b>  | -3677.82772811 | -3676.87917  | -3676.82530  | -3676.95406  |
| <b>H<sub>5</sub></b>  | -4597.39224497 | -4596.20526  | -4596.13720  | -4596.29454  |
| <b>H<sub>6</sub></b>  | -5516.94024832 | -5515.51504  | -5515.43275  | -5515.61915  |
| <b>H<sub>7</sub></b>  | -6436.47890919 | -6434.81556  | -6434.71903  | -6434.93478  |
| <b>H<sub>8</sub></b>  | -7356.01185300 | -7354.11032  | -7353.99958  | -7354.24197  |
| <b>I<sub>3</sub></b>  | -2758.21642259 | -2757.50484  | -2757.46529  | -2757.56539  |
| <b>I<sub>4</sub></b>  | -3677.82955897 | -3676.87808  | -3676.82455  | -3676.95184  |
| <b>I<sub>5</sub></b>  | -4597.40365656 | -4596.21289  | -4596.14524  | -4596.30043  |
| <b>I<sub>6</sub></b>  | -5516.95788503 | -5515.52806  | -5515.44623  | -5515.62974  |
| <b>I<sub>7</sub></b>  | -6436.50052734 | -6434.83174  | -6434.73569  | -6434.94790  |
| <b>J<sub>6</sub></b>  | -6467.09536833 | -6464.87595  | -6464.74661  | -6465.06300  |
| <b>1mer</b>           | -1463.75343199 | -1463.23547  | -1463.20599  | -1463.29727  |

|                            |                |             |             |             |
|----------------------------|----------------|-------------|-------------|-------------|
| <b>2mer</b>                | -2541.61426228 | -2540.72625 | -2540.67488 | -2540.81835 |
| <b>benzene</b>             | -232.253750536 | -232.15303  | -232.14770  | -232.18049  |
| <b>naphthalene</b>         | -385.892706628 | -385.74491  | -385.73717  | -385.77611  |
| <b>phenanthrene</b>        | -539.538630394 | -539.34380  | -539.33342  | -539.37865  |
| <b>chrysene</b>            | -693.181978362 | -692.94025  | -692.92714  | -692.97877  |
| <b>[4]helicene</b>         | -693.172469823 | -692.93042  | -692.91751  | -692.96836  |
| <b>[5]helicene</b>         | -846.806915776 | -846.51845  | -846.50286  | -846.55951  |
| <b>bp</b>                  | -845.654380392 | -845.38700  | -845.37259  | -845.42641  |
| <b>K<sub>6</sub></b>       | -6454.08520730 | -6452.09360 | -6451.98000 | -6452.24406 |
| <b>2-phenylnaphthalene</b> | -616.950161806 | -616.72132  | -616.70890  | -616.75941  |
| <b>S1</b>                  | -1154.11224810 | -1153.73017 | -1153.70844 | -1153.78145 |
| <b>S2</b>                  | -1922.33093428 | -1921.71463 | -1921.67911 | -1921.78357 |
| <b>S3</b>                  | -5381.08491677 | -5379.38323 | -5379.28382 | -5379.53559 |
| <i>B3LYP-D3/6-31G(d)</i>   |                |             |             |             |
| <b>[4]helicene</b>         | -693.198150102 | -692.95598  | -692.94308  | -692.99393  |
| <b>[5]helicene</b>         | -846.841948084 | -846.55322  | -846.53765  | -846.59426  |
| <b>naphthalene</b>         | -385.903979145 | -385.75611  | -385.74837  | -385.78730  |
| <b>phenanthrene</b>        | -539.556629780 | -539.36169  | -539.35131  | -539.39655  |
| <i>M06-2X/6-31G(d)</i>     |                |             |             |             |
| <b>[4]helicene</b>         | -692.879090504 | -692.63455  | -692.62171  | -692.67241  |
| <b>[5]helicene</b>         | -846.455678177 | -846.16417  | -846.14868  | -846.20512  |
| <b>naphthalene</b>         | -385.718805919 | -385.56950  | -385.56179  | -385.60069  |
| <b>phenanthrene</b>        | -539.304797723 | -539.10802  | -539.09768  | -539.14287  |

a)  $E$ : electronic energy;  $ZPE$ : zero-point energy;  $H (= E + ZPE + E_{\text{vib}} + E_{\text{rot}} + E_{\text{trans}} + RT)$ : sum of electronic and thermal enthalpies;  $G (= H - TS)$ : sum of electronic and thermal free energies.

## 5. References

- S1 M. J. Frisch, G. W. Trucks, H. B. Schlegel, G. E. Scuseria, M. A. Robb, J. R. Cheeseman, G. Scalmani, V. Barone, G. A. Petersson, H. Nakatsuji, X. Li, M. Caricato, A. V. Marenich, J. Bloino, B. G. Janesko, R. Gomperts, B. Mennucci, H. P. Hratchian, J. V. Ortiz, A. F. Izmaylov, J. L. Sonnenberg, D. Williams-Young, F. Ding, F. Lipparini, F. Egidi, J. Goings, B. Peng, A. Petrone, T. Henderson, D. Ranasinghe, V. G. Zakrzewski, J. Gao, N. Rega, G. Zheng, W. Liang, M. Hada, M. Ehara, K. Toyota, R. Fukuda, J. Hasegawa, M. Ishida, T. Nakajima, Y. Honda, O. Kitao, H. Nakai, T. Vreven, K. Throssell, J. A. Montgomery, Jr., J. E. Peralta, F. Ogliaro, M. J. Bearpark, J. J. Heyd, E. N. Brothers, K. N. Kudin, V. N. Staroverov, T. A. Keith, R. Kobayashi, J. Normand, K. Raghavachari, A. P. Rendell, J. C. Burant, S. S. Iyengar, J. Tomasi, M. Cossi, J. M. Millam, M. Klene, C. Adamo, R. Cammi, J. W. Ochterski, R. L. Martin, K. Morokuma, O. Farkas, J. B. Foresman and D. J. Fox, Gaussian 16, Revision B.01, Gaussian, Inc., Wallingford CT, 2016.
- S2 A. D. Becke, *J. Chem. Phys.* 1993, **98**, 5648-5652.
- S3 C. Lee, W. Yang and R. G. Parr, *Phys. Rev. B* 1988, **37**, 785-789.
- S4 S. Grimme, J. Antony, S. Ehrlich and H. Krieg, *J. Chem. Phys.*, 2010, **132**, 154104.
- S5 Y. Zhao and D. G. Truhlar, *Theor. Chem. Acc.*, 2008, **120**, 215-241.
